# Supplementary material
Source: PubMed Central journal article supplement (PMC4430551)
Supplement: NIHMS677075-supplement-Supplement1.pdf [file NIHMS677075-supplement-Supplement1.pdf]

## Supplementary Appendix

This appendix has been provided by the authors to give readers additional information about their work.

Supplement to: Gauderman WJ, Urman R, Avol E, et al. Association of improved air quality with lung development in children. *N Engl J Med* 2015;372:905-13. DOI: 10.1056/NEJMoa1414123

## Online Supplement

### Association of Improved Air Quality with Lung Development in Children

*W. James Gauderman, Robert Urman, Edward Avol, Kiros Berhane, Rob McConnell,  
Edward Rappaport, Roger Chang, Fred Lurmann, Frank Gilliland*

#### Table of Contents

|                                                                                                                                                                                                                                                         |    |
|---------------------------------------------------------------------------------------------------------------------------------------------------------------------------------------------------------------------------------------------------------|----|
| Figure S1: Follow up periods for cohorts C, D, and E, including the years and average ages of follow-up.....                                                                                                                                            | 2  |
| Figure S2: Locations of all CHS communities and the five specific communities (red dots) in which lung function measurements were obtained for all three cohorts .....                                                                                  | 2  |
| Figure S3: Levels of coarse particles (PM <sub>10</sub> – PM <sub>2.5</sub> ). See Figure 1 for labeling details. ....                                                                                                                                  | 3  |
| Figure S4: Community-average 4-year growth in FEV1 (a) and FVC (b) from age 11 to 15 versus the corresponding community-average levels of coarse particles.....                                                                                         | 3  |
| Figure S5: Predicted change in 4-yr lung function growth (vertical change in the trend lines of Figure 2) versus the change in average NO <sub>2</sub> over the study period (horizontal change in the trend lines of Figure 2) for each community..... | 4  |
| Table S1: Demographic Characteristics .....                                                                                                                                                                                                             | 5  |
| Table S2: Mean pollutant levels corresponding to the colored bands in Figure 1 .....                                                                                                                                                                    | 6  |
| Table S3: Mean lung function level and growth in girls and boys .....                                                                                                                                                                                   | 7  |
| Table S4: Sensitivity analysis of the effect of decreased NO <sub>2</sub> levels on 4-year lung function growth .....                                                                                                                                   | 8  |
| Table S5: Estimated difference in 4-yr height growth for average decreases in ambient pollutant levels.....                                                                                                                                             | 9  |
| Table S6: Correlation coefficients among changes in community-specific mean pollutant levels from 1994-1997 to 2007-2010 .....                                                                                                                          | 10 |
| Table S7: Cross sectional analysis of lung function at age 15 to examine sensitivity to the use of different spirometers .....                                                                                                                          | 11 |
| Statistical Modeling .....                                                                                                                                                                                                                              | 12 |

**Figure S1: Follow up periods for cohorts C, D, and E, including the years and average ages of follow-up.**

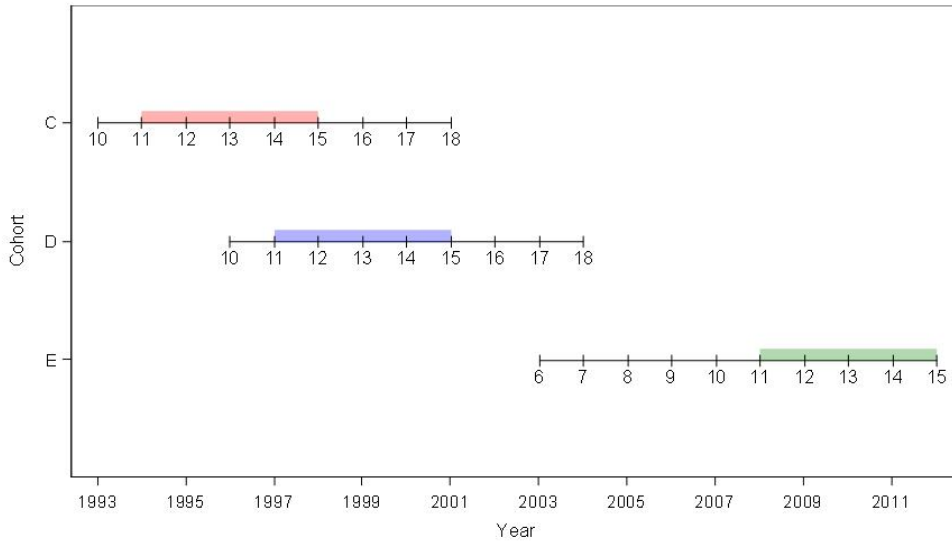

**Figure S2: Locations of all CHS communities and the five specific communities (red dots) in which lung function measurements were obtained for all three cohorts**

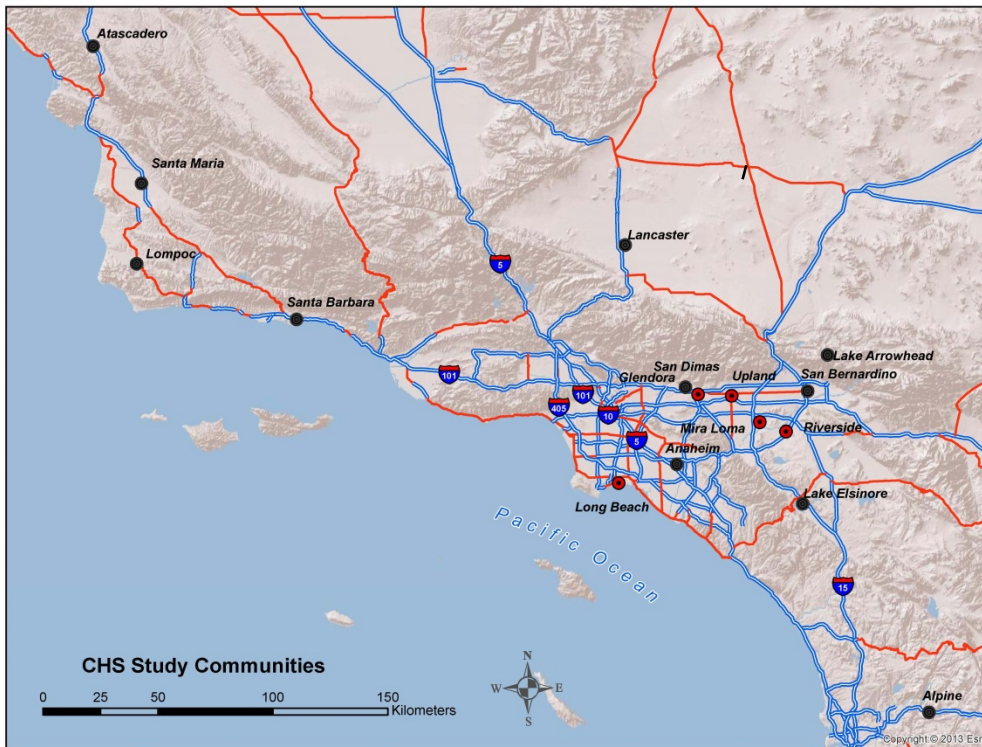

**Figure S3: Levels of coarse particles (PM<sub>10</sub> – PM<sub>2.5</sub>). See Figure 1 for labeling details.**

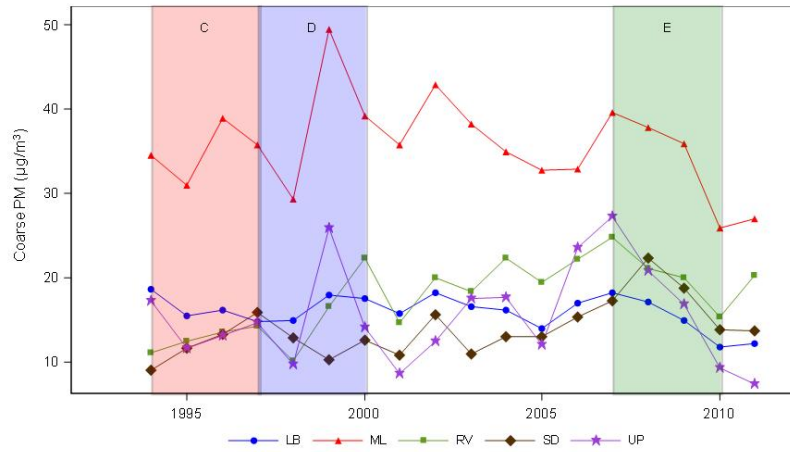

**Figure S4: Community-average 4-year growth in FEV<sub>1</sub> (a) and FVC (b) from age 11 to 15 versus the corresponding community-average levels of coarse particles.**

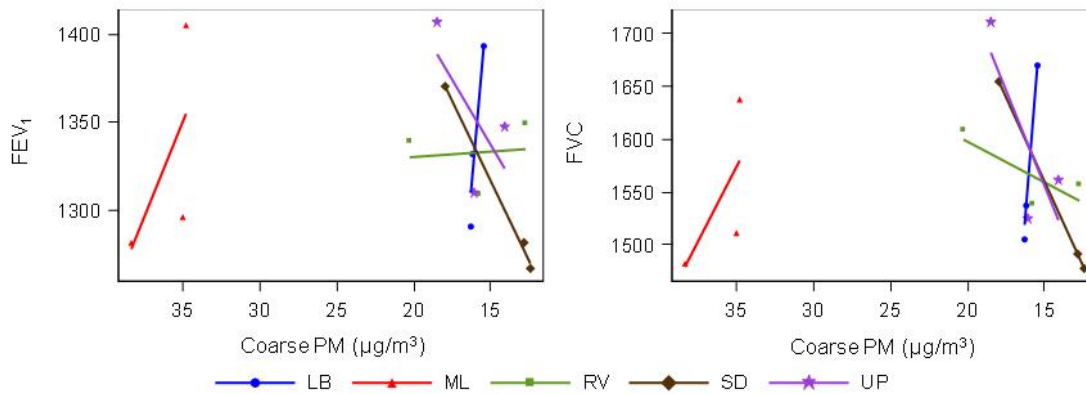

**Notes on Figures S3 and S4: Analysis of coarse particles**

There was relatively little variability in the levels of coarse particles (PM<sub>10</sub> – PM<sub>2.5</sub>) over the study period (Figure S3), compared to that observed for PM<sub>10</sub> and PM<sub>2.5</sub> (Figure 1). There was not a statistically significant association between the change in coarse particles over time and 4-yr growth of either FEV<sub>1</sub> (p=0.59) or FVC (p=0.18, Figure S4).

**Figure S5: Predicted change in 4-yr lung function growth (vertical change in the trend lines of Figure 2) versus the change in average NO<sub>2</sub> over the study period (horizontal change in the trend lines of Figure 2) for each community (LB=Long Beach, ML=Mira Loma, RV=Riverside, SD=San Dimas, UP=Upland)**

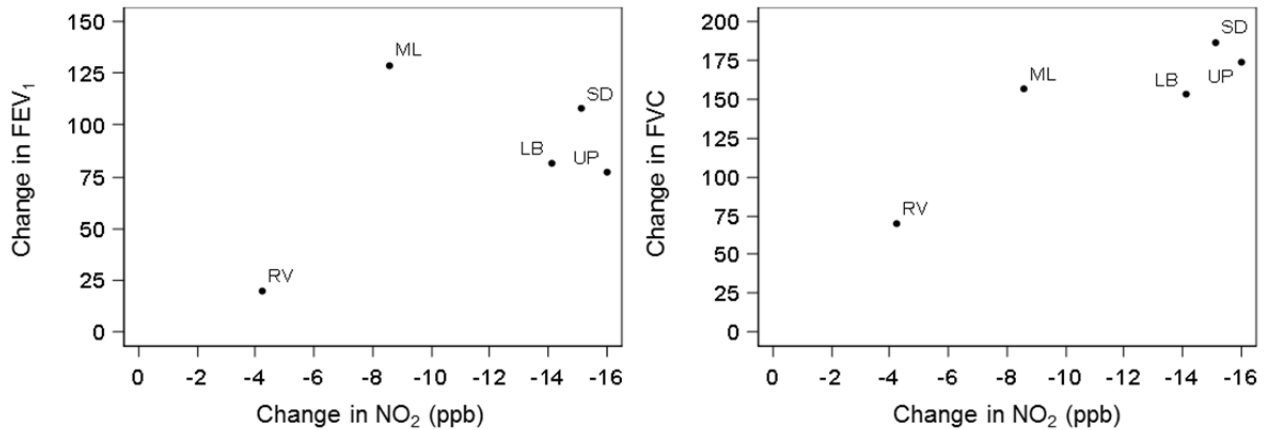

**Notes on Figure S5: The analysis of the magnitude of pollutant effect on lung function growth versus the magnitude of change in air quality**

We investigated whether the expected gain in lung function over time within any one community was aligned with the magnitude of improvement in air quality within that community. Based on Figure 2, we abstracted the predicted change in lung function growth for each community over the study period as the vertical change in the corresponding trend line. Also based on Figure 2, we abstracted the community-specific changes in NO<sub>2</sub> over the study period, represented by the horizontal changes of each trend line. For example, over the study period, in Riverside the decline in NO<sub>2</sub> was 4.3 ppb with a corresponding estimated increase in FEV<sub>1</sub> growth of 19.8 ml (Figure 2), while in San Dimas the decline in NO<sub>2</sub> was larger (15.1 ppb) as was the estimated increase in FEV<sub>1</sub> growth (107.8 ml). Plotting the vertical changes versus horizontal changes from Figure 2 produces the figure above (Figure S5). We observe a trend in the exposure-response relationship for NO<sub>2</sub> with both FEV<sub>1</sub> and FVC. These plots suggest that if we did have a pure 'control' community, one with zero change in air quality over the study period, we might expect to observe little change in lung function growth.

**Table S1: Demographic Characteristics**

| Variable                         | All<br>N=2,120 | Cohort C<br>N=669 | Cohort D<br>N=588 | Cohort E<br>N=863 | P-value* |
|----------------------------------|----------------|-------------------|-------------------|-------------------|----------|
| Age at baseline†                 | 11.0 (0.5)     | 10.9 (0.5)        | 10.9 (0.4)        | 11.3 (0.6)        | <0.001   |
| Height (cm)†                     |                |                   |                   |                   |          |
| Age 11                           | 145.9 (6.9)    | 145.7 (6.8)       | 145.8 (6.8)       | 146.0 (7.1)       | 0.73     |
| Age 13                           | 158.0 (7.3)    | 157.7 (7.4)       | 157.8 (7.4)       | 158.2 (7.2)       | 0.44     |
| Age 15                           | 165.6 (6.9)    | 165.5 (6.9)       | 165.8 (7.1)       | 165.6 (6.7)       | 0.85     |
| Male                             |                |                   |                   |                   |          |
| No                               | 1105 (52.1%)   | 344 (51.4%)       | 298 (50.7%)       | 463 (53.7%)       | 0.49     |
| Yes                              | 1015 (47.9%)   | 325 (48.6%)       | 290 (49.3%)       | 400 (46.3%)       |          |
| Race                             |                |                   |                   |                   |          |
| Asian                            | 157 ( 7.8%)    | 61 ( 9.4%)        | 47 ( 8.0%)        | 49 ( 6.3%)        | <0.001   |
| Black                            | 126 ( 6.3%)    | 60 ( 9.2%)        | 43 ( 7.4%)        | 23 ( 3.0%)        |          |
| Mixed                            | 229 (11.4%)    | 47 ( 7.2%)        | 57 ( 9.7%)        | 125 (16.1%)       |          |
| Other                            | 469 (23.4%)    | 130 (20.0%)       | 115 (19.7%)       | 224 (28.9%)       |          |
| White                            | 1027 (51.1%)   | 351 (54.1%)       | 323 (55.2%)       | 353 (45.6%)       |          |
| Hispanic ethnicity               |                |                   |                   |                   |          |
| Yes                              | 870 (42.1%)    | 204 (31.0%)       | 193 (32.9%)       | 473 (57.6%)       | <0.001   |
| No                               | 1196 (57.9%)   | 455 (69.0%)       | 393 (67.1%)       | 348 (42.4%)       |          |
| Asthma at baseline               |                |                   |                   |                   |          |
| No                               | 1646 (82.2%)   | 536 (86.3%)       | 465 (82.9%)       | 645 (78.7%)       | <0.001   |
| Yes                              | 356 (17.8%)    | 85 (13.7%)        | 96 (17.1%)        | 175 (21.3%)       |          |
| Education                        |                |                   |                   |                   |          |
| Did not finish HS                | 300 (14.8%)    | 107 (16.5%)       | 61 (10.7%)        | 132 (16.3%)       | 0.0105   |
| HS diploma/some college          | 1167 (57.6%)   | 372 (57.4%)       | 352 (62.0%)       | 443 (54.6%)       |          |
| College diploma or greater       | 560 (27.6%)    | 169 (26.1%)       | 155 (27.3%)       | 236 (29.1%)       |          |
| Insurance                        |                |                   |                   |                   |          |
| No                               | 252 (12.3%)    | 110 (16.9%)       | 78 (13.5%)        | 64 ( 7.9%)        | <0.001   |
| Yes                              | 1790 (87.7%)   | 540 (83.1%)       | 501 (86.5%)       | 749 (92.1%)       |          |
| In-utero smoke exposure          |                |                   |                   |                   |          |
| No                               | 1793 (88.2%)   | 532 (82.7%)       | 494 (86.4%)       | 767 (93.7%)       | <0.001   |
| Yes                              | 241 (11.8%)    | 111 (17.3%)       | 78 (13.6%)        | 52 ( 6.3%)        |          |
| Passive tobacco smoke exposure   |                |                   |                   |                   |          |
| No                               | 1555 (77.9%)   | 477 (73.7%)       | 411 (73.7%)       | 667 (84.2%)       | <0.001   |
| Yes                              | 442 (22.1%)    | 170 (26.3%)       | 147 (26.3%)       | 125 (15.8%)       |          |
| Smoked >100 cigarettes by age 15 |                |                   |                   |                   |          |
| No                               | 2077 (98.0%)   | 643 (96.1%)       | 573 (97.4%)       | 861 (99.8%)       | <0.001   |
| Yes                              | 43 ( 2.0%)     | 26 ( 3.9%)        | 15 ( 2.6%)        | 2 ( 0.2%)         |          |
| Pests                            |                |                   |                   |                   |          |
| No                               | 483 (25.3%)    | 137 (22.8%)       | 100 (18.6%)       | 246 (31.9%)       | <0.001   |
| Yes                              | 1428 (74.7%)   | 464 (77.2%)       | 438 (81.4%)       | 526 (68.1%)       |          |
| Pets                             |                |                   |                   |                   |          |
| No                               | 627 (30.4%)    | 172 (25.7%)       | 110 (18.7%)       | 345 (42.8%)       | <0.001   |
| Yes                              | 1437 (69.6%)   | 497 (74.3%)       | 478 (81.3%)       | 462 (57.2%)       |          |
| Dogs                             |                |                   |                   |                   |          |
| No                               | 1114 (54.0%)   | 319 (47.7%)       | 260 (44.2%)       | 535 (66.3%)       | <0.001   |
| Yes                              | 950 (46.0%)    | 350 (52.3%)       | 328 (55.8%)       | 272 (33.7%)       |          |
| Cats                             |                |                   |                   |                   |          |
| No                               | 1457 (70.6%)   | 444 (66.4%)       | 360 (61.2%)       | 653 (80.9%)       | <0.001   |
| Yes                              | 607 (29.4%)    | 225 (33.6%)       | 228 (38.8%)       | 154 (19.1%)       |          |
| Carpet                           |                |                   |                   |                   |          |
| No                               | 125 ( 6.1%)    | 29 ( 4.5%)        | 21 ( 3.6%)        | 75 ( 9.2%)        | <0.001   |
| Yes                              | 1917 (93.9%)   | 621 (95.5%)       | 558 (96.4%)       | 738 (90.8%)       |          |
| Mildew/Mold                      |                |                   |                   |                   |          |
| No                               | 1484 (75.4%)   | 484 (75.7%)       | 428 (75.5%)       | 572 (75.1%)       | 0.96     |
| Yes                              | 484 (24.6%)    | 155 (24.3%)       | 139 (24.5%)       | 190 (24.9%)       |          |
| Water damage                     |                |                   |                   |                   |          |
| No                               | 1733 (85.2%)   | 552 (84.9%)       | 494 (85.8%)       | 687 (84.9%)       | 0.89     |
| Yes                              | 302 (14.8%)    | 98 (15.1%)        | 82 (14.2%)        | 122 (15.1%)       |          |
| Gas stove                        |                |                   |                   |                   |          |
| No                               | 322 (15.7%)    | 102 (15.6%)       | 109 (18.8%)       | 111 (13.7%)       | 0.038    |
| Yes                              | 1723 (84.3%)   | 552 (84.4%)       | 472 (81.2%)       | 699 (86.3%)       |          |
| Air conditioning                 |                |                   |                   |                   |          |
| No                               | 425 (20.6%)    | 156 (23.7%)       | 143 (24.6%)       | 126 (15.3%)       | <0.001   |
| Yes                              | 1640 (79.4%)   | 503 (76.3%)       | 439 (75.4%)       | 698 (84.7%)       |          |
| Date of home construction        |                |                   |                   |                   |          |
| 1960s to 1970s                   | 692 (32.6%)    | 215 (32.1%)       | 184 (31.3%)       | 293 (34.0%)       | 0.11     |
| 1980 or later                    | 604 (28.5%)    | 199 (29.7%)       | 167 (28.4%)       | 238 (27.6%)       |          |
| Before 1960                      | 440 (20.8%)    | 146 (21.8%)       | 137 (23.3%)       | 157 (18.2%)       |          |
| Do not know/Missing              | 384 (18.1%)    | 109 (16.3%)       | 100 (17.0%)       | 175 (20.3%)       |          |

† Values for age and height are the mean (standard deviation).

\* p-value comparing mean age and height and proportions of remaining variables across the three cohorts. The test for height includes adjustment for sex, race, and Hispanic ethnicity

**Table S2: Mean pollutant levels corresponding to the colored bands in Figure 1**

| Pollutant                              | Cohort | Years     | Long Beach    | Mira Loma     | Riverside     | San Dimas     | Upland        |
|----------------------------------------|--------|-----------|---------------|---------------|---------------|---------------|---------------|
| NO <sub>2</sub> (ppb)                  | C      | 1994-1997 | 34.4          | 23.3          | 24.7          | 36.6          | 39.4          |
|                                        | D      | 1997-2000 | 32.9 ( -4.5%) | 25.3 ( 8.5%)  | 25.7 ( 4.0%)  | 32.4 (-11.6%) | 36.2 ( -8.1%) |
|                                        | E      | 2007-2010 | 20.3 (-41.0%) | 16.7 (-28.3%) | 21.4 (-13.2%) | 21.5 (-41.3%) | 23.4 (-40.7%) |
| O <sub>3</sub> (10a-6p, ppb)           | C      | 1994-1997 | 28.6          | 56.2          | 61.9          | 52            | 48.8          |
|                                        | D      | 1997-2000 | 28.8 ( 0.7%)  | 49.3 (-12.3%) | 54.1 (-12.5%) | 41.4 (-20.5%) | 40.9 (-16.1%) |
|                                        | E      | 2007-2010 | 31.4 ( 10.0%) | 48.4 (-13.9%) | 54.5 (-11.9%) | 46.6 (-10.5%) | 47.5 ( -2.6%) |
| PM <sub>10</sub> (µg/m <sup>3</sup> )  | C      | 1994-1997 | 37.5          | 66.5          | 42.1          | 36.9          | 42.9          |
|                                        | D      | 1997-2000 | 35.9 ( -4.2%) | 66.0 ( -0.7%) | 41.5 ( -1.4%) | 32.5 (-12.0%) | 39.9 ( -7.1%) |
|                                        | E      | 2007-2010 | 28.4 (-24.2%) | 52.6 (-20.8%) | 33.4 (-20.7%) | 29.9 (-19.1%) | 34.7 (-19.2%) |
| PM <sub>2.5</sub> (µg/m <sup>3</sup> ) | C      | 1994-1997 | 21.3          | 31.5          | 29.3          | 24.5          | 28.7          |
|                                        | D      | 1997-2000 | 19.7 ( -7.5%) | 27.6 (-12.2%) | 25.7 (-12.2%) | 19.6 (-19.9%) | 23.8 (-17.2%) |
|                                        | E      | 2007-2010 | 13.0 (-38.9%) | 17.8 (-43.3%) | 13.1 (-55.3%) | 11.9 (-51.6%) | 16.1 (-43.9%) |

Mean pollutant level over the indicated 4-yr period in each community (values in parentheses are the percent change compared to Cohort C)

**Table S3: Mean lung function level and growth in girls and boys**

| Outcome               | Girls    |          |             | Boys     |       |             |
|-----------------------|----------|----------|-------------|----------|-------|-------------|
|                       | Age      |          | 4-yr growth | Age      |       | 4-yr growth |
| 11 years              | 15 years | 11 years |             | 15 years |       |             |
| FEV <sub>1</sub> (ml) | 2,274    | 3,150    | 876         | 2,311    | 3,831 | 1,520       |
| FVC (ml)              | 2,581    | 3,573    | 992         | 2,708    | 4,483 | 1,774       |



**Table S4: Sensitivity analysis of the effect of decreased NO<sub>2</sub> levels on 4-year lung function growth**

| Model                               | FEV <sub>1</sub> growth, age 11 to 15 |         | FVC growth, age 11 to 15 |         |
|-------------------------------------|---------------------------------------|---------|--------------------------|---------|
|                                     | Difference                            | P-value | Difference               | P-value |
| <b>Base model (NO<sub>2</sub>)*</b> | 91.4 ( 47.9, 134.9)                   | <0.001  | 168.9 ( 127.0, 210.7)    | <0.001  |
| <b>Additional Adjustments</b>       |                                       |         |                          |         |
| Base + education                    | 90.7 ( 47.6, 133.9)                   | <0.001  | 168.4 ( 126.8, 210.0)    | <0.001  |
| Base + insurance                    | 89.1 ( 45.6, 132.7)                   | <0.001  | 166.5 ( 127.4, 205.7)    | <0.001  |
| Base + in-utero smoke               | 90.7 ( 47.3, 134.1)                   | <0.001  | 168.6 ( 126.8, 210.5)    | <0.001  |
| Base + passive smoke exposure       | 90.6 ( 47.4, 133.7)                   | <0.001  | 168.5 ( 126.8, 210.2)    | <0.001  |
| Base + active tobacco smoking       | 90.9 ( 47.5, 134.4)                   | <0.001  | 167.8 ( 126.9, 208.7)    | <0.001  |
| Base + acute O <sub>3</sub>         | 94.0 ( 51.9, 136.0)                   | <0.001  | 169.7 ( 128.4, 210.9)    | <0.001  |
| Base + asthma                       | 92.6 ( 49.3, 136.0)                   | <0.001  | 168.1 ( 126.4, 209.9)    | <0.001  |
| Base + pests                        | 89.2 ( 46.4, 131.9)                   | <0.001  | 169.2 ( 127.2, 211.2)    | <0.001  |
| Base + pets                         | 87.4 ( 44.1, 130.7)                   | <0.001  | 167.4 ( 125.1, 209.6)    | <0.001  |
| Base + dog                          | 90.7 ( 46.3, 135.1)                   | <0.001  | 169.9 ( 126.9, 213.0)    | <0.001  |
| Base + cat                          | 88.7 ( 45.2, 132.1)                   | <0.001  | 165.8 ( 124.5, 207.1)    | <0.001  |
| Base + carpet                       | 88.6 ( 45.8, 131.5)                   | <0.001  | 167.8 ( 126.1, 209.5)    | <0.001  |
| Base + mildew/mold                  | 91.2 ( 47.4, 135.0)                   | <0.001  | 168.6 ( 126.7, 210.6)    | <0.001  |
| Base + water damage                 | 91.2 ( 47.8, 134.7)                   | <0.001  | 168.7 ( 127.0, 210.4)    | <0.001  |
| Base + gas stove                    | 92.0 ( 48.4, 135.6)                   | <0.001  | 170.0 ( 128.0, 212.0)    | <0.001  |
| Base + air conditioning             | 90.7 ( 47.3, 134.2)                   | <0.001  | 168.4 ( 126.9, 209.9)    | <0.001  |
| Base + date of home construction    | 91.8 ( 48.1, 135.5)                   | <0.001  | 168.7 ( 126.9, 210.4)    | <0.001  |
| <b>Subgroups</b>                    |                                       |         |                          |         |
| Girls only                          | 70.9 ( 29.3, 112.5)                   | <0.001  | 113.0 ( 71.4, 154.6)     | <0.001  |
| Boys only                           | 112.4 ( 43.1, 181.8)                  | 0.002   | 236.3 ( 165.4, 307.2)    | <0.001  |
| Non-hispanic white                  | 84.2 ( 21.3, 147.1)                   | 0.0087  | 168.8 ( 109.3, 228.4)    | <0.001  |
| Hispanic white                      | 104.4 ( 42.8, 165.9)                  | 0.0009  | 179.0 ( 107.3, 250.7)    | <0.001  |
| Non-asthmatics only                 | 82.2 ( 35.1, 129.4)                   | <0.001  | 139.2 ( 97.0, 181.4)     | <0.001  |
| Asthmatics only                     | 150.8 ( 43.2, 258.5)                  | 0.006   | 306.9 ( 195.0, 418.9)    | <0.001  |
| Complete data at ages 11 and 15     | 87.8 ( 45.3, 130.2)                   | <0.001  | 161.7 ( 122.0, 201.3)    | <0.001  |

\* Base model is equivalent to the effect estimates shown for NO<sub>2</sub> in Table 1

**Table S5: Estimated difference in 4-yr height growth for average decreases in ambient pollutant levels**

| Pollutant             | Level at age 11 |               |         | Level at age 15 |               |         | Growth, age 11 to 15 |               |         |
|-----------------------|-----------------|---------------|---------|-----------------|---------------|---------|----------------------|---------------|---------|
|                       | Difference      |               | P-value | Difference      |               | P-value | Difference           |               | P-value |
| NO <sub>2</sub>       | 0.26            | (-0.65, 1.16) | 0.58    | -0.13           | (-0.91, 0.66) | 0.75    | -0.39                | (-1.12, 0.34) | 0.29    |
| O <sub>3</sub> (10-6) | 0.18            | (-0.39, 0.74) | 0.55    | 0.18            | (-0.30, 0.67) | 0.46    | 0.01                 | (-0.44, 0.46) | 0.97    |
| PM <sub>10</sub>      | 0.16            | (-0.54, 0.86) | 0.66    | -0.07           | (-0.68, 0.53) | 0.81    | -0.24                | (-0.81, 0.34) | 0.42    |
| PM <sub>2.5</sub>     | 0.07            | (-0.73, 0.87) | 0.87    | -0.06           | (-0.75, 0.62) | 0.85    | -0.14                | (-0.83, 0.56) | 0.70    |

Estimated differences in height growth (in cm) are scaled to the median of the 5 community-specific declines in each air pollutant, specifically to 14.1 ppb in NO<sub>2</sub>, 5.5 ppb in O<sub>3</sub> (10 am - 6 pm), 8.7 µg/m<sup>3</sup> in PM<sub>10</sub>, and 12.6 µg/m<sup>3</sup> in PM<sub>2.5</sub>

**Notes on Table S5: The analysis of height growth**

We analyzed the association between height growth and changes in air quality to determine whether the pollution-related associations we observed with lung function growth might be due to a more general time trend in physiological development. We used the same spline-based approach as was used for lung function (see “Statistical Modeling” in this supplement) to model the relationship between height and air quality. This model included adjustments for sex, race, Hispanic ethnicity, and study community. As shown above, neither height growth nor mean height at age 11 or 15 is significantly associated with the change in any of the pollutants.

**Table S6: Correlation coefficients among changes in community-specific mean pollutant levels from 1994-1997 to 2007-2010**

| Pollutant        | O <sub>3</sub> | PM <sub>10</sub> | PM <sub>2.5</sub> |
|------------------|----------------|------------------|-------------------|
| NO <sub>2</sub>  | 0.02           | 0.82             | 0.82              |
| O <sub>3</sub>   |                | 0.33             | 0.39              |
| PM <sub>10</sub> |                |                  | 0.93              |

**Table S7: Cross sectional analysis of lung function at age 15 to examine sensitivity to the use of different spirometers**

| Outcome          | Pollutant             | Cohort E: Measured Lung Function <sup>a</sup> |         | Cohort E: Modeled Lung Function <sup>b</sup> |         |
|------------------|-----------------------|-----------------------------------------------|---------|----------------------------------------------|---------|
|                  |                       | Difference                                    | P-value | Difference                                   | P-value |
| FEV <sub>1</sub> | NO <sub>2</sub>       | 200.0 ( 142.7, 257.3)                         | <0.001  | 209.3 ( 153.7, 265.0)                        | <0.001  |
|                  | O <sub>3</sub> (10-6) | -12.4 ( -48.1, 23.3)                          | 0.49    | -10.2 ( -44.9, 24.6)                         | 0.57    |
|                  | PM <sub>10</sub>      | 120.8 ( 75.7, 166.0)                          | <0.001  | 130.3 ( 86.4, 174.2)                         | <0.001  |
|                  | PM <sub>2.5</sub>     | 132.9 ( 82.4, 183.4)                          | <0.001  | 143.6 ( 94.6, 192.7)                         | <0.001  |
| FVC              | NO <sub>2</sub>       | 293.0 ( 231.5, 354.6)                         | <0.001  | 342.0 ( 282.3, 401.7)                        | <0.001  |
|                  | O <sub>3</sub> (10-6) | -13.7 ( -52.7, 25.2)                          | 0.49    | 20.2 ( -18.0, 58.3)                          | 0.30    |
|                  | PM <sub>10</sub>      | 180.8 ( 132.0, 229.6)                         | <0.001  | 245.7 ( 198.6, 292.8)                        | <0.001  |
|                  | PM <sub>2.5</sub>     | 218.1 ( 163.7, 272.4)                         | <0.001  | 306.9 ( 254.7, 359.0)                        | <0.001  |

a Measured values using the ScreenStar spirometer for Cohort E (Spiroflow spirometer used for Cohorts C and D)

b Modeled values used for Cohort E, based on a prediction model for Spiroflow-spirometer measurements as a function of ScreenStar-spirometer values. Measured values from the Spiroflow were used for Cohorts C and D.

**Notes on Table S7: Sensitivity analysis related to the use of different spirometers**

For Cohorts C and D, PF testing was performed using rolling-seal spirometers (Spiroflow Model 132; P.K. Morgan Ltd., Gillingham, UK), while in Cohort E, PF testing was performed using pressure transducer-based spirometers (Screenstar, Morgan Scientific, Haverhill, Massachusetts, USA). Sensitivity analyses were conducted to assess whether the use of different spirometers (“Spiroflow” in Cohorts C and D, “Screenstar” in Cohort E) might have influenced pollution effect estimates. In a prior study, we measured FEV<sub>1</sub> and FVC on 59 children aged 17.3 to 19.5 years using both spirometers. These data were used to build two prediction models for Spiroflow FEV<sub>1</sub> and FVC, respectively, as a function of the corresponding Screenstar values. That model was developed on older teenagers, and thus we applied it to the last year of observation in Cohort E (mean age 15) to obtain predicted Spiroflow-based FEV<sub>1</sub> and FVC. Using the age-15 cross-sectional data for all three cohorts, we estimated the effect of declines in air pollution on mean FEV<sub>1</sub> and FVC, first using the Screenstar measurements for Cohort E and then using the Spiroflow predictions for Cohort E (above Table S7). Statistically significant associations were observed for both FEV<sub>1</sub> and FVC with NO<sub>2</sub>, PM<sub>10</sub>, and PM<sub>2.5</sub> (all with P<0.001) regardless of the reference spirometer for cohort E. This suggests that use of Screenstar measurements in Cohort E for the primary analyses did not lead to any systematic biases in the pollution effects reported elsewhere in this paper.

## Statistical Modeling

We used a mixed-effect linear spline model to investigate the relationship between longitudinal measurements of lung function and change in air quality. The use of a spline model was necessary in order to properly depict the non-linear growth trajectory of lung function during adolescence. Linear splines are piecewise linear functions that are joined smoothly at a pre-specified number of breakpoints, known as knots.<sup>1</sup> Such modeling approaches have been used for lung function trajectories in the Harvard six cities study<sup>2</sup> and the Southern California Children's Health Study<sup>3-7</sup>.

To describe the model, let  $Y_{ij}$  denote the lung function measurement on subject  $i$  at visit  $j$  and let  $T_{ij}$  denote the corresponding age at which the measurement was recorded. We define  $T_{ij}^* = (T_{ij} - T_0)/R$  to be age centered at age  $T_0$  and standardized to range  $R$ , which allows us, for example, to focus on mean lung function at age  $T_0$  (e.g. age 15) and growth in lung function over range  $R$  (e.g. 4 years from 11 to 15). Let  $Z_{km}$  denote the multi-year mean level of a given pollutant (e.g.  $\text{NO}_2$  or  $\text{PM}_{2.5}$ , as shown in Table S2) for cohort  $k$  in community  $m$ . Let  $\mathbf{X}_{ij}$  denote a vector of adjustment covariates, which includes both time-dependent (e.g. height, BMI) and time-independent (e.g. community, sex, race) variables. The model relating longitudinal lung function measurements to age, pollution, and covariates has the form:

$$Y_{ij} = \alpha_0 + \alpha_1 T_{ij}^* + \beta_0 Z_{km} + \beta_1 Z_{km} T_{ij}^* + \delta S(T_{ij}^*) + \gamma \mathbf{X}_{ij} + \mathbf{e}_{km} + \mathbf{e}_i + \mathbf{e}_{ij}$$

The parameters of primary interest are  $\beta_1$ , which quantifies how air pollution for cohort  $k$  in community  $m$  affects lung function growth over age range  $R$ , and  $\beta_0$ , which quantifies how air pollution affects mean lung function at age  $T_0$ . The function  $S(T_{ij}^*)$  parameterizes the spline, with knots at ages 12, 14, and 16. A fixed effect for community is included as part of the adjustment covariates to focus health-effect estimates and inferences on temporal changes in air pollution (rather than cross-community comparisons). Random effects for both level and growth are included at the cohort/community level ( $\mathbf{e}_{km}$ ) and individual level ( $\mathbf{e}_i$ ), with an overall residual ( $\mathbf{e}_{ij}$ ) that captures deviations of each observed lung function measurement from the fitted model. The HPMIXED procedure in SAS (Version 9.4, SAS Institute Inc., Cary, NC) was used to fit the models.

### *References for Statistical Modeling*

1. DeBoor C. A Practical Guide to Splines. New York: Springer-Verlag; 1974.
2. Wang X, Dockery D, Wypij D, et al. Pulmonary function growth velocity in children 6 to 18 years of age. *Am Rev Respir Dis* 1993;148:1502-8.
3. Gauderman WJ, Avol E, Gilliland F, et al. The effect of air pollution on lung development from 10 to 18 years of age. *N Engl J Med* 2004;351:1057-67.
4. Gauderman WJ, Vora H, McConnell R, et al. Effect of exposure to traffic on lung development from 10 to 18 years of age: a cohort study. *Lancet* 2007;369:571-7.
5. Berhane K, Gauderman W, Stram D, Thomas D. Statistical issues in studies of the long term effects of air pollution: The southern California Children's Health Study (with discussion). *Stat Sci* 2005;19:414-49.
6. Berhane K, McConnell R, Gilliland F, et al. Sex-specific effects of asthma on pulmonary function in children. *Am J Respir Crit Care Med* 2000;162:1723-30.
7. Berhane K, Molitor NT. A Bayesian approach to functional-based multilevel modeling of longitudinal data: applications to environmental epidemiology. *Biostatistics* 2008;9:686-99.
